# Supplementary material for: Comparison of Fibrinogen Concentrate and Cryoprecipitate on Major Thromboembolic Events after Living Donor Liver Transplantation
Source: MDPI journal article supplement (doi:10.3390/jcm12237496), 2023-12-04
Supplement: s1 [file s1]

**Supplemental Table S1.** Demographic feature between no transfusion and fibrinogen products transfusion group

|                              | <sup>a</sup> No transfusion group<br>(N=105) | Fibrinogen /<br>Cryoprecipitate group<br>(N=206) | Total<br>(N=311)       | P-value |
|------------------------------|----------------------------------------------|--------------------------------------------------|------------------------|---------|
| Demographic data             |                                              |                                                  |                        |         |
| Age                          | 57.0 (48.0-62.0)                             | 56.0 (50.0-62.0)                                 | 56.0 (49.0-62.0)       | 0.755   |
| Sex, male                    | 66 (62.9)                                    | 147 (71.4)                                       | 213 (68.5)             | 0.162   |
| BMI                          | 23.6 (21.2-25.8)                             | 23.2 (20.6-26.4)                                 | 23.4 (20.9-26.3)       | 0.996   |
| Diabetes                     | 30 (28.6)                                    | 63 (30.6)                                        | 93 (29.9)              | 0.814   |
| Hypertension                 | 29 (27.6)                                    | 45 (21.8)                                        | 74 (23.8)              | 0.322   |
| CKD                          | 4 (3.8)                                      | 8 (3.9)                                          | 12 (3.9)               | 1.000   |
| CAD                          | 8 (7.6)                                      | 5 (2.4)                                          | 13 (4.2)               | 0.062   |
| CVA                          | 2 (1.9)                                      | 5 (2.4)                                          | 7 (2.3)                | 1.000   |
| MELD-Na score                | 10.0 (8.0-15.0)                              | 17.0 (10.0-24.0)                                 | 14.0 (9.0-21.0)        | <0.001  |
| CTP score                    | 7.0 (6.0-9.0)                                | 9.0 (7.0-11.0)                                   | 8.0 (6.0-10.0)         | <0.001  |
| Cause for LT                 |                                              |                                                  |                        |         |
| HBV LC                       | 53 (50.5)                                    | 80 (38.8)                                        | 133 (42.8)             | 0.066   |
| HCV LC                       | 3 (2.9)                                      | 11 (5.3)                                         | 14 (4.5)               | 0.478   |
| Alcoholic LC                 | 29 (27.6)                                    | 89 (43.2)                                        | 118 (37.9)             | 0.011   |
| HCC                          | 55 (52.9)                                    | 80 (38.8)                                        | 135 (43.4)             | 0.031   |
| Laboratory variables         |                                              |                                                  |                        |         |
| Hemoglobin, g/dl             | 10.4 (9.2-12.1)                              | 9.9 (8.3-11.7)                                   | 10.1 (8.6-11.8)        | 0.012   |
| Platelet, 10 <sup>9</sup> /L | 76.0 (52.0-111.0)                            | 58.0 (38.0-82.0)                                 | 65.0 (42.0-92.5)       | <0.001  |
| INR                          | 1.18 (1.08-1.35)                             | 1.42 (1.23-1.75)                                 | 1.32 (1.16-1.60)       | <0.001  |
| AST                          | 33.0 (24.0-49.0)                             | 38.0 (27.0-54.0)                                 | 36.0 (26.0-52.0)       | 0.028   |
| ALT                          | 19.0 (13.0-29.0)                             | 21.0 (15.0-32.0)                                 | 20.0 (14.0-31.0)       | 0.253   |
| Total bilirubin, mg/dl       | 1.1 (0.7-2.3)                                | 2.2 (1.2-5.2)                                    | 1.7 (0.9-3.9)          | <0.001  |
| Albumin, g/dl                | 3.1 (2.7-3.6)                                | 2.9 (2.6-3.4)                                    | 3.0 (2.6-3.5)          | 0.021   |
| Sodium                       | 139.0 (138.0-141.0)                          | 138.0 (134.0-141.0)                              | 139.0 (136.0-141.0)    | <0.001  |
| Creatinine, mg/dl            | 0.74 (0.60-0.92)                             | 0.82 (0.66-1.06)                                 | 0.80 (0.63-1.00)       | 0.019   |
| Intraoperative variables     |                                              |                                                  |                        |         |
| Operation time, hour         | 11.4 (10.1-12.9)                             | 12.3 (11.2-14.0)                                 | 12.0 (10.7-13.7)       | <0.001  |
| Crystalloid, ml              | 5700.0 (4500.0-6900.0)                       | 6450.0 (4700.0-9050.0)                           | 6200.0 (4550.0-8400.0) | 0.006   |
| Colloid, ml                  | 2800.0 (2000.0-3200.0)                       | 3600.0 (2800.0-5200.0)                           | 3200.0 (2400.0-4400.0) | <0.001  |
| Urine output                 | 1800.0 (1370.0-2460.0)                       | 1755.0 (1200.0-2580.0)                           | 1765.0 (1255.0-2530.0) | 0.493   |
| Outcomes                     |                                              |                                                  |                        |         |
| MTE                          | 8 (7.6)                                      | 30 (14.6)                                        | 38 (12.2)              | 0.113   |
| PVT & HVT                    | 8 (7.6)                                      | 27 (13.1)                                        | 35 (11.3)              | 0.208   |
| HAT                          | 0 (0)                                        | 2 (1.0)                                          | 2 (0.6)                | 0.793   |
| Ischemic stroke              | 0 (0)                                        | 1 (0.5)                                          | 1 (0.3)                | 1.000   |

|             | <sup>a</sup> No transfusion group<br>(N=105) | Fibrinogen /<br>Cryoprecipitate group<br>(N=206) | Total<br>(N=311) | P-value |
|-------------|----------------------------------------------|--------------------------------------------------|------------------|---------|
| 30-day MACE | 21 (20.0)                                    | 37 (18.0)                                        | 58 (18.7)        | 0.777   |

Note: Values are expressed as the mean  $\pm$  SD, number (%), or median (1Q, 3Q).

Abbreviations: BMI, body mass index; CKD, chronic kidney disease; CAD, coronary artery disease; CVA, cerebrovascular accident; MELD-Na, Model for End-stage Liver Disease-Sodium; CTP, Child-Turcotte-Pugh; LT, liver transplantation; LC, liver cirrhosis; HCC, hepatocellular carcinoma; INR, international normalized ratio; AST, aspartate aminotransferase; ALT, alanine aminotransferase; MTEs, major thromboembolic events; PVT, portal vein thrombosis; HVT, hepatic vein thrombosis; HAT, hepatic artery thrombosis; MACE, Major adverse cardiovascular events

<sup>a</sup> Patients who did not receive cryoprecipitate and fibrinogen concentrate but received pRBC or FFP transfusion
